# Supplementary material
Source: Springer Nature journal article supplement (https://www.springermedizin.de/resource/supplementary/12891_2012_1456_MOESM1_ESM.pdf/9507936)

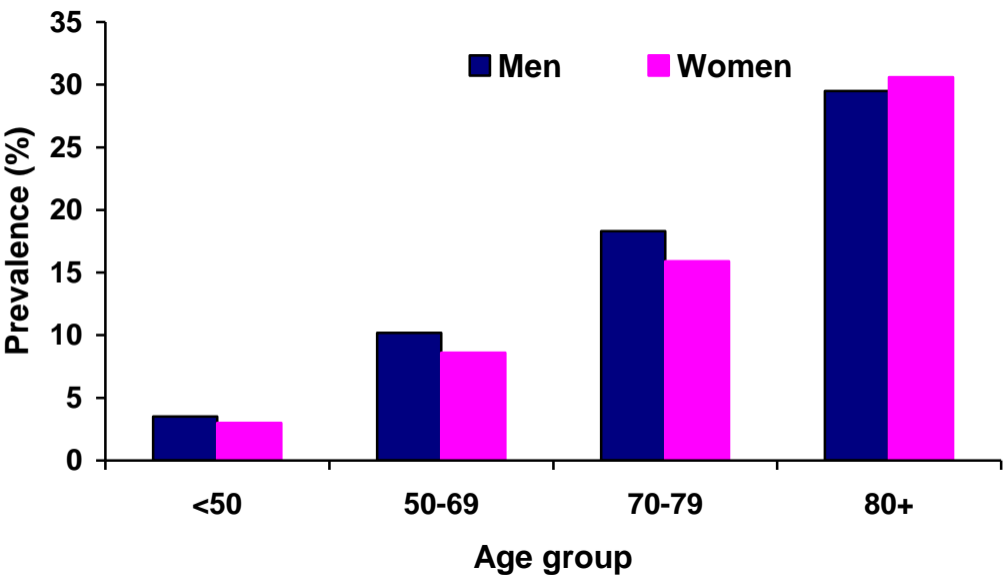

Supplement: MOESM1 [file 9507936]
